# Supplementary material for: Natural Variation in Vif: Differential Impact on APOBEC3G/3F and a Potential Role in HIV-1 Diversification
Source: PubMed Central journal article supplement (PMC1238741; doi:10.1371/journal.ppat.0010006), 2005-07-22
Supplement: ppat.0010006.sg001.pdf [file ppat.0010006.sg001.pdf]

↑ Supplementary Figure 1 online  
(Simon et al.)

|              | 11         | 22                 | 32                 | 40                 | 45                  |            |                    |                     |            |            |            |      |            |
|--------------|------------|--------------------|--------------------|--------------------|---------------------|------------|--------------------|---------------------|------------|------------|------------|------|------------|
| NL4-3        | MENRWQVMIV | <b>WQ</b> VDRMRINT | <b>WK</b> RLVKHHMY | <b>IS</b> RKAKDWFY | RHHY <b>ES</b> TNPK | ISSEVHIPLG | <b>DA</b> KLVIITYW | GLHT <b>GE</b> RDWH | LGGVGSIEWR | KKRYSTQVDP |            |      |            |
| P1-9         |            | -S-                | -G-                | -H-                |                     |            |                    |                     |            |            |            |      |            |
| <u>P1-10</u> |            | -S-                | -G-                | -H-                |                     |            |                    |                     |            |            |            |      |            |
| P2-8         |            | -RA-               | -S-                | -R-G-              | -G-                 |            |                    |                     |            |            |            |      | -N-        |
| <u>P2-6</u>  |            | -RA-               | -S-                | -R-G-              | -G-                 |            |                    |                     |            |            |            |      | -N-        |
| <u>P2-7</u>  |            | <b>R</b> -         | -RA-               | -S-                | -R-G-               | -G-        |                    |                     |            |            | <b>E</b> - |      | <b>R</b> - |
| P3-2         |            | -R-                | -S-                | -G-                | -G-                 |            |                    |                     |            |            | -R-        |      | -R-        |
| <u>P3-5</u>  |            | -R-                | -S-                | -G-                | -G-                 | <b>H</b>   |                    |                     |            |            | -R-        |      | -R-        |
| <u>P3-6</u>  |            | -R-                | -S-                | -G-                | -G-                 |            |                    |                     |            |            | -R-        |      | -R-        |
| V1-3         |            | -RA-               | -S-                | -G-                | -RK-                |            |                    |                     |            |            | E-         | V-   | QR-        |
| <u>V1-5</u>  |            | -RA-               | -S-                | -A-                | -G-                 | -RK-       |                    |                     |            |            | E-         | V-   | QR-        |
| <u>V1-12</u> |            | -RA-               | -S-                | -G-                | -RK-                |            |                    |                     |            |            | E-         | V-   | QR-        |
| V2-1         |            | -V-                | -K-                | -S-                | -H-                 | -R-        | -SG-               |                     |            |            | -R-        | -V-  | -A-        |
| <u>V2-5</u>  |            | -V-                | -K-                | <b>ES</b>          | -H-                 | -R-        | -SG-               |                     |            |            | -R-        | -V-  | -A-        |
| V3-2         |            | -R-                | -S-                | -H-                | -G-                 | -G-        | -V-                |                     |            |            | -R-        | -V-  | -A-        |
| <u>V3-8</u>  |            | -R-                | -S-                | -H-                | <b>PG</b>           | -G-        | -V-                |                     |            |            | -R-        | -V-  | -A-        |
| V4-1         |            | -R-                | -NS-               | -Y-                | -V-                 | -K-        | -SG-               |                     |            |            | -N-        | -PH- | -R-        |
| <u>V4-8</u>  |            | <b>*</b>           | -R-                | -NS-               | -Y-                 | -V-        | -K-                | -SG-                |            |            | -N-        | -PH- | -R-        |

100

|              | 115        | 138                 | 143        | 150        |                     |            |            |            |            |     |  |  |     |
|--------------|------------|---------------------|------------|------------|---------------------|------------|------------|------------|------------|-----|--|--|-----|
| NL4-3        | DLADQLIHLH | YFDC <b>PS</b> ESAI | RNTILGRIVS | PRCEYQAGHN | KV <b>GS</b> LQYLAL | AALIKPKQIK | PPLPSVRKLT | EDRWNKPKQT | KGHRGSHTMN | GH* |  |  |     |
| P1-9         | N-         | -Y-                 | -A-        | -V-        | -H-                 | -S-        |            |            |            |     |  |  | -T- |
| <u>P1-10</u> | N-         | -Y-                 | -A-        | -V-        | -H-                 | -S-        |            |            |            |     |  |  | -T- |
| P2-8         | N-         | -Y-                 | -A-        | -V-        | -H-                 | -S-        |            |            |            |     |  |  | -T- |
| <u>P2-6</u>  | N-         | -Y-                 | -A-        | -V-        | -H-                 | -S-        |            |            |            |     |  |  | -T- |
| <u>P2-7</u>  | N-         | -Y-                 | -A-        | -V-        | -H-                 | -S-        |            |            |            |     |  |  | -T- |
| P3-2         | N-         | -Y-                 | -A-        | -V-        | -H-                 | -S-        |            |            |            |     |  |  | -T- |
| <u>P3-5</u>  | N-         | -Y-                 | -A-        | -V-        | -H-                 | -S-        |            |            |            |     |  |  | -T- |
| <u>P3-6</u>  | N-         | -Y-                 | <b>S</b> - | -A-        | -H-                 | -S-        |            |            |            |     |  |  | -T- |
| V1-3         |            | -KAL-               | -YR-       | T-         |                     |            |            |            |            |     |  |  | -R- |
| <u>V1-5</u>  |            | -KAL-               | -YR-       | T-         |                     |            |            |            |            |     |  |  | -R- |
| <u>V1-12</u> |            | -KAL-               | -YR-       | T-         |                     |            |            |            |            |     |  |  | -R- |
| V2-1         | G-         | -QY                 | -A-        | -H-        | -S-                 |            |            |            |            |     |  |  | -R- |
| <u>V2-5</u>  | G-         | -QY                 | -A-        | -H-        | -S-                 |            |            |            |            |     |  |  | -R- |
| V3-2         | G-         | -T-R-               | -Y-        | -A-        | -H-                 | -S-        |            |            |            |     |  |  | -R- |
| <u>V3-8</u>  | G-         | -T-R-               | -Y-        | -A-        | -H-                 | -S-        |            |            |            |     |  |  | -R- |
| V4-1         | G-         | -T-R-               | -Y-        | -A-        | -H-                 | -S-        |            |            |            |     |  |  | -R- |
| <u>V4-8</u>  | G-         | -T-R-               | -Y-        | -A-        | -H-                 | -S-        |            |            |            |     |  |  | -R- |

192

**Supplemental Figure 1:** The sequences of functional and non-functional vif alleles (underlined) were compared in order to identify positions relevant for inactivation of Vif. The residues in which the alleles differ are depicted in bold. In some instances the closest related functional allele differed in more than one residue from its non-functional counterpart. \* at position 11 of V4-8 depicts a premature stop codon.
