# Supplementary material for: Natural Variation in Vif: Differential Impact on APOBEC3G/3F and a Potential Role in HIV-1 Diversification
Source: PubMed Central journal article supplement (PMC1238741; doi:10.1371/journal.ppat.0010006), 2005-07-22
Supplement: ppat.0010006.st001.pdf [file ppat.0010006.st001.pdf]

↑ Supplementary Table 1 online  
(Simon et al.)

| Patient | Risk | Duration of infection | CD4 T lymphocytes<br>(cells/mm <sup>3</sup> ) | HIV-1 RNA<br>(copies/ml) |
|---------|------|-----------------------|-----------------------------------------------|--------------------------|
| V1      | MSM  | <2 months             | 263                                           | >1 500 000               |
| V2      | n.k. | chronic               | <500                                          | >1 000 000               |
| V3      | MSM  | <1 month              | 475                                           | >1 000 000               |
| V4      | MSM  | <1 month              | 423                                           | >500 000                 |
| P1      | MSM  | >22 years             | 560-740                                       | <50                      |
| P2      | IVDU | >21 years             | 800-1000                                      | <50                      |
| P3      | IVDU | >21 years             | 500-700                                       | <50                      |

**Supplementary Table 1:** Summary of clinical and virological characteristics of the four patients from whom virus was cultivated as well as from the three long term non-progressors (LTNP) studied.

n.k.: not known, IVDU: intra-venous drug use; MSM: men that have sex with men
